# Supplementary material
Source: PubMed Central journal article supplement (PMC3940166)
Supplement: NIHMS499387-supplement-1_si_001.pdf [file NIHMS499387-supplement-1_si_001.pdf]

SUPPORTING INFORMATION

# Conserved Hydrogen Bonding Networks of MitoNEET Tune FeS Cluster Binding and Structural Stability

*Daniel W. Bak<sup>‡</sup> and Sean J. Elliott<sup>§\*</sup>*

<sup>‡</sup>Program in Molecular, and Cellular Biology, and Biochemistry and the <sup>§</sup>Department of Chemistry, Boston University, Boston, MA 02215.

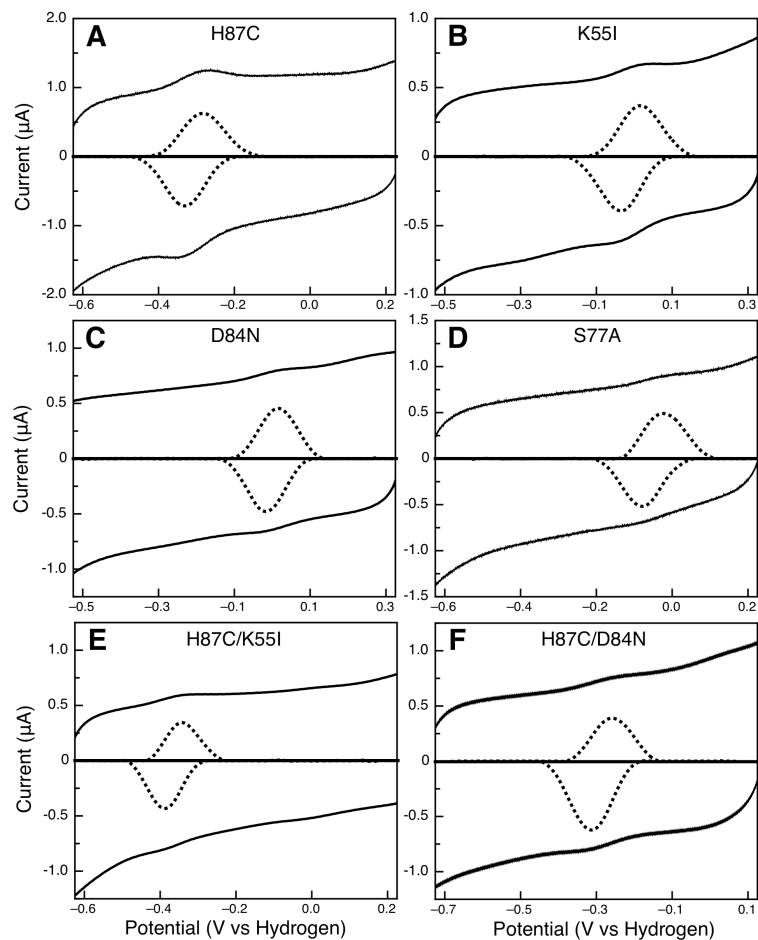

Figure S1: Typical PFV data for site-directed variants of mitoNEET: (A) H87C, (B) K55I, (C) D84N, (D) S77A, (E) H87C/K55I, and (F) H87C/D84N. Raw data (solid black line) and baseline subtracted data (dotted black line) are shown for each variant. All data shown were collected at pH 7.0.

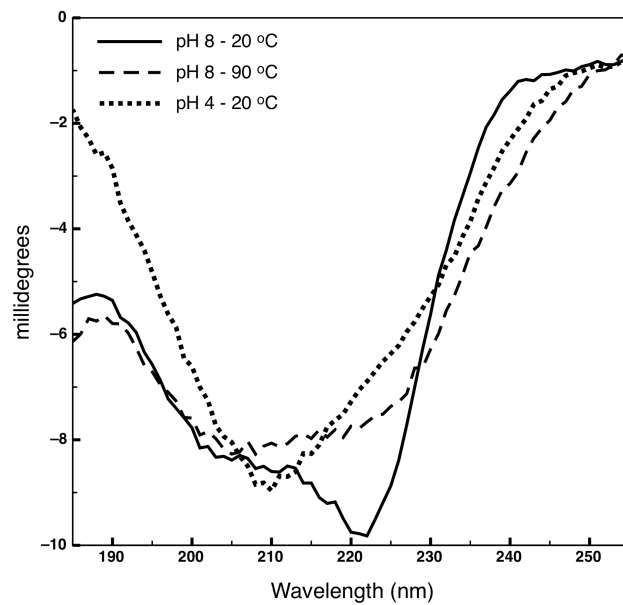

Figure S2: UV circular dichroism spectra (UV-CD) for wild-type mitoNEET : At pH 8 at 20 °C (solid line) and 90 °C (dashed line) or at pH 4 and 20 °C (dotted line). Protein concentrations are all 250 uM in 25 mM sodium acetate, 25 mM sodium phosphate, and 50 mM sodium sulfate.

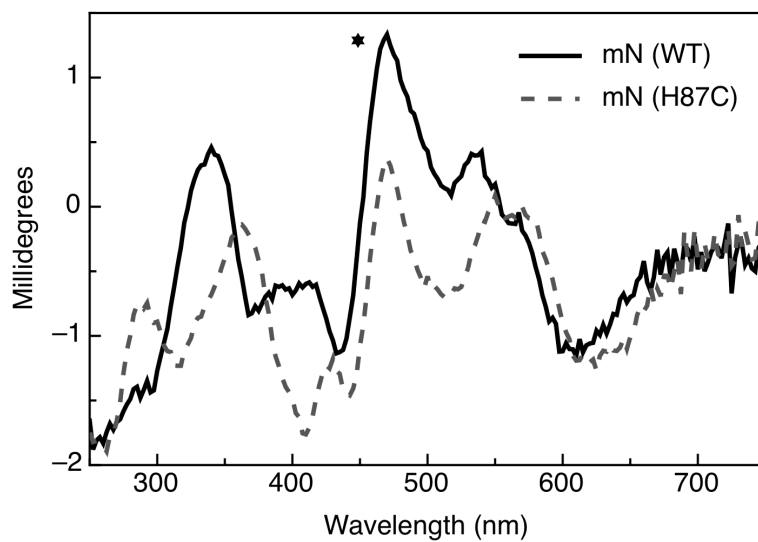

Figure S3: Visible circular dichroism spectra for both wild-type (solid line) and H87C (dashed line) mitoNEET. Both spectrum are of the oxidized protein in 25 mM sodium acetate, 25 mM sodium phosphate and 50 mM sodium sulfate at pH 8, at protein concentrations of 250  $\mu$ M. The asterix denotes the peak at 470 nm, which is monitored in melting assays as a signal for cluster loss.
